# Supplementary material for: Shared inflammatory glial cell signature after stab wound injury, revealed by spatial, temporal, and cell-type-specific profiling of the murine cerebral cortex
Source: PubMed Central journal article supplement (PMC10991294; doi:10.1038/s41467-024-46625-w), 2024-04-03
Supplement: 41467_2024_46625_MOESM3_ESM.pdf [file 41467_2024_46625_MOESM3_ESM.pdf]

## Description of Additional Supplementary Files

### Supplementary Data 1

Cluster VI significantly enriched genes ( $pval < 0.05$ ,  $\log_2$  fold change  $> 1$ ) and GO term over-represented in cluster VI. Significance was determined using the GO enrichment analysis on gene sets.

### Supplementary Data 2

Gene set enrichment analysis along the spatial gradient. Significance was determined using GSEA by hypergeometric testing within the groups.

### Supplementary Data 3

Top 10 enrichment genes across the 30 scRNA-seq clusters of the UMAP in Fig.3b. Significance was determined using the “t-test overestimated\_variance” method.

### Supplementary Data 4

Top 20 enrichment genes across the 30 scRNA-seq clusters of the UMAP in Fig.4b. Significance was determined using the “t-test overestimated\_variance” method.

### Supplementary Data 5

Differentially expressed genes (DEGs) of each glial subcluster ( $pval < 0.05$ ,  $\log_2$  fold change  $> 1.6$  or  $< -1.6$ ). DEGs are determined by comparing each glial subcluster to all other subclusters within the respective cell type. Significance was determined using the “t-test overestimated\_variance.” method.

### Supplementary Data 6

GO term analysis of the 241 commonly upregulated genes from the comparison of clusters MG4, AG5, and OPCs2. Significance was determined using the GO enrichment analysis on gene sets.

### Supplementary Data 7

GO term analysis of the DEGs between INH and CTRL conditions in each cluster and at each timepoint. Significance was determined by performing GO enrichment analysis on gene sets.

### Supplementary Data 8

List of the fit parameters for the distribution of microglia cells, obtained by applying the multipack function to the extracted parameters (Fig. 7d-g, Supplementary Fig 14d,e). The data distributions are compared using Compare Datasets: fitcmpdata function in Origin.
