# Supplementary material for: Shared inflammatory glial cell signature after stab wound injury, revealed by spatial, temporal, and cell-type-specific profiling of the murine cerebral cortex
Source: PubMed Central journal article supplement (PMC10991294; doi:10.1038/s41467-024-46625-w), 2024-04-03
Supplement: 41467_2024_46625_MOESM11_ESM.pdf [file 41467_2024_46625_MOESM11_ESM.pdf]

**Supplementary Data 8**  
**Statistics for comparison of circularity (related to Fig. 7d)**

| Fit Comparison of Data                                                        |                                                              |          |                                                             |                      |
|-------------------------------------------------------------------------------|--------------------------------------------------------------|----------|-------------------------------------------------------------|----------------------|
| Description                                                                   |                                                              |          |                                                             |                      |
| Input Data                                                                    | CTRL<br>Source Data<br>TAB: Fig. 7d-g<br>Column: circularity |          | INH<br>Source Data<br>TAB: Fig. 7d-g<br>Column: circularity |                      |
| Fit Report                                                                    | Fit Report CTRL (see bellow)                                 |          | Fit Report INH (see bellow)                                 |                      |
| Equation                                                                      | $y = y_0 + A * e^{-\frac{1}{2} * (\frac{x-x_c}{w})^2}$       |          | $y = y_0 + A * e^{-\frac{1}{2} * (\frac{x-x_c}{w})^2}$      |                      |
| Function                                                                      | GaussAmp                                                     |          | GaussAmp                                                    |                      |
| Number of Points                                                              | 68                                                           |          | 68                                                          |                      |
| Number of Parameters                                                          | 10                                                           |          | 10                                                          |                      |
| F-test                                                                        |                                                              |          |                                                             |                      |
|                                                                               | F                                                            | Numer.DF | Denom.DF                                                    | Prob > F             |
|                                                                               | 7.269                                                        | 10       | 116                                                         | 7.630e <sup>-9</sup> |
| At the 0.05 significance level, the two datasets are significantly different. |                                                              |          |                                                             |                      |

| Fit Reports    |                         |                |       |                    |         |                   |            |       |                    |         |                   |            |
|----------------|-------------------------|----------------|-------|--------------------|---------|-------------------|------------|-------|--------------------|---------|-------------------|------------|
|                | Peak                    | Parameter      | CTRL  |                    |         |                   |            | INH   |                    |         |                   |            |
|                |                         |                | Value | Standard Error     | t-Value | Prob> t           | Dependency | Value | Standard Error     | t-Value | Prob> t           | Dependency |
| Fit Parameters | Peak 1                  | y <sub>0</sub> | 0.181 | 0.596              | 0.303   | 0.762             | 0.524      | 0.938 | 0.565              | 1.659   | 0.102             | 0.421      |
|                |                         | x <sub>c</sub> | 0.037 | 0.001              | 24.45   | 3e <sup>-32</sup> | 0.928      | 0.032 | 5.6e <sup>-4</sup> | 57.42   | 8e <sup>-53</sup> | 0.777      |
|                |                         | w              | 0.012 | 9.5e <sup>-4</sup> | 12.63   | 2e <sup>-18</sup> | 0.879      | 0.007 | 4.9e <sup>-4</sup> | 15.58   | 2e <sup>-22</sup> | 0.802      |
|                |                         | A              | 69.06 | 9.363              | 7.376   | 6e <sup>-10</sup> | 0.969      | 86.91 | 5.802              | 14.97   | 1e <sup>-21</sup> | 0.862      |
|                |                         | FWHM           | 0.028 | 0.002              | -       | -                 | -          | 0.018 | 0.001              | -       | -                 | -          |
|                |                         | Area           | 2.079 | 0.419              | -       | -                 | -          | 1.674 | 0.173              | -       | -                 | -          |
|                | Peak 2                  | y <sub>0</sub> | 0.181 | 0.596              | 0.303   | 0.762             | 0.524      | 0.938 | 0.565              | 1.659   | 0.102             | 0.421      |
|                |                         | x <sub>c</sub> | 0.071 | 0.005              | 13.93   | 3e <sup>-20</sup> | 0.968      | 0.055 | 0.001              | 31.31   | 4e <sup>-38</sup> | 0.762      |
|                |                         | w              | 0.017 | 0.007              | 2.285   | 0.099             | 0.991      | 0.008 | 0.002              | 3.439   | 0.001             | 0.923      |
|                |                         | A              | 37.59 | 21.62              | 1.738   | 0.087             | 0.996      | 28.86 | 11.04              | 2.613   | 0.011             | 0.967      |
|                |                         | FWHM           | 0.042 | 0.018              | -       | -                 | -          | 0.020 | 0.006              | -       | -                 | -          |
|                |                         | Area           | 1.683 | 1.659              | -       | -                 | -          | 0.638 | 0.392              | -       | -                 | -          |
|                | Peak 3                  | y <sub>0</sub> | 0.181 | 0.596              | 0.303   | 0.762             | 0.524      | 0.938 | 0.565              | 1.659   | 0.12              | 0.421      |
|                |                         | x <sub>c</sub> | 0.110 | 0.044              | 2.461   | 0.016             | 0.994      | 0.079 | 0.007              | 10.66   | 2e <sup>-15</sup> | 0.971      |
|                |                         | w              | 0.025 | 0.020              | 1.203   | 0.233             | 0.984      | 0.023 | 0.004              | 5.145   | 3e <sup>-6</sup>  | 0.952      |
|                |                         | A              | 12.60 | 12.02              | 1.048   | 0.298             | 0.991      | 33.01 | 3.642              | 9.062   | 1e <sup>-12</sup> | 0.888      |
|                |                         | FWHM           | 0.059 | 0.049              | -       | -                 | -          | 0.056 | 0.010              | -       | -                 | -          |
|                |                         | Area           | 0.791 | 1.380              | -       | -                 | -          | 1.983 | 0.552              | -       | -                 | -          |
| Fit Statistics | Number of Points        | 68             |       |                    |         |                   | 68         |       |                    |         |                   |            |
|                | Degrees of Freedom      | 58             |       |                    |         |                   | 58         |       |                    |         |                   |            |
|                | Reduced Chi-Sqr         | 11.51          |       |                    |         |                   | 12.56      |       |                    |         |                   |            |
|                | Residual Sum of Squares | 667.5          |       |                    |         |                   | 728.9      |       |                    |         |                   |            |
|                | R-Square (COD)          | 0.977          |       |                    |         |                   | 0.978      |       |                    |         |                   |            |
|                | Adj. R-Square           | 0.974          |       |                    |         |                   | 0.974      |       |                    |         |                   |            |

**Statistics for comparison of soma volume (related to Fig. 7e)**

| Fit Comparison of Data                                                        |                                                          |          |                                                         |                      |
|-------------------------------------------------------------------------------|----------------------------------------------------------|----------|---------------------------------------------------------|----------------------|
| Description                                                                   |                                                          |          |                                                         |                      |
| Input Data                                                                    | CTRL<br>Source Data<br>TAB: Fig. 7d-g<br>Column: somaVol |          | INH<br>Source Data<br>TAB: Fig. 7d-g<br>Column: somaVol |                      |
| Fit Report                                                                    | Fit Report CTRL (see bellow)                             |          | Fit Report INH (see bellow)                             |                      |
| Equation                                                                      | $y = y_0 + A * e^{-\frac{1}{2} * (\frac{x-x_c}{w})^2}$   |          | $y = y_0 + A * e^{-\frac{1}{2} * (\frac{x-x_c}{w})^2}$  |                      |
| Function                                                                      | GaussAmp                                                 |          | GaussAmp                                                |                      |
| Number of Points                                                              | 250                                                      |          | 250                                                     |                      |
| Number of Parameters                                                          | 7                                                        |          | 7                                                       |                      |
| F-test                                                                        |                                                          |          |                                                         |                      |
|                                                                               | F                                                        | Numer.DF | Denom.DF                                                | Prob > F             |
|                                                                               | 13.44                                                    | 7        | 486                                                     | 6.66e <sup>-16</sup> |
| At the 0.05 significance level, the two datasets are significantly different. |                                                          |          |                                                         |                      |

| Fit Reports             |                |                    |       |                |         |                    |            |       |                |         |                     |            |
|-------------------------|----------------|--------------------|-------|----------------|---------|--------------------|------------|-------|----------------|---------|---------------------|------------|
|                         | Peak           | Parameter          | CTRL  |                |         |                    |            | INH   |                |         |                     |            |
|                         |                |                    | Value | Standard Error | t-Value | Prob> t            | Dependency | Value | Standard Error | t-Value | Prob> t             | Dependency |
| Fit Parameters          | Peak 1         | y <sub>0</sub>     | 0.299 | 0.125          | 2.380   | 0.018              | 0.162      | 0.206 | 0.149          | 1.381   | 0.168               | 0.201      |
|                         |                | x <sub>c</sub>     | 221.2 | 1.791          | 123.5   | 2e <sup>-221</sup> | 0.274      | 210.1 | 2.544          | 82.60   | 7e <sup>-180</sup>  | 0.374      |
|                         |                | w                  | 53.66 | 2.277          | 23.56   | 1e <sup>-64</sup>  | 0.700      | 83.93 | 5.386          | 15.58   | 1.9e <sup>-38</sup> | 0.905      |
|                         |                | A                  | 41.52 | 1.455          | 28.52   | 1e <sup>-79</sup>  | 0.670      | 45.85 | 3.691          | 12.42   | 9.3e <sup>-28</sup> | 0.955      |
|                         |                | FWHM               | 126.3 | 5.362          | -       | -                  | -          | 197.6 | 12.68          | -       | -                   | -          |
|                         |                | Area               | 5586  | 343.1          | -       | -                  | -          | 9647  | 1335           | -       | -                   | -          |
|                         | Peak 2         | y <sub>0</sub>     | 0.299 | 0.125          | 2.380   | 0.018              | 0.162      | 0.206 | 0.149          | 1.381   | 0.168               | 0.201      |
|                         |                | x <sub>c</sub>     | 327.8 | 7.961          | 41.18   | 1e <sup>-111</sup> | 0.655      | 422.0 | 48.85          | 8.639   | 7.6e <sup>-16</sup> | 0.959      |
|                         |                | w                  | 183.4 | 5.787          | 31.69   | 2e <sup>-88</sup>  | 0.521      | 212.0 | 27.32          | 7.763   | 2.3e <sup>-13</sup> | 0.908      |
|                         |                | A                  | 25.68 | 1.083          | 23.71   | 3e <sup>-65</sup>  | 0.825      | 15.05 | 1.475          | 10.20   | 1.4e <sup>-20</sup> | 0.890      |
|                         |                | FWHM               | 431.9 | 13.62          | -       | -                  | -          | 499.4 | 64.33          | -       | -                   | -          |
|                         |                | Area               | 11811 | 477.5          | -       | -                  | -          | 8002  | 1635           | -       | -                   | -          |
|                         | Fit Statistics | Number of Points   | 250   |                |         |                    |            | 250   |                |         |                     |            |
|                         |                | Degrees of Freedom | 243   |                |         |                    |            | 243   |                |         |                     |            |
| Reduced Chi-Sqr         |                | 3.31595            |       |                |         |                    | 4.47978    |       |                |         |                     |            |
| Residual Sum of Squares |                | 805.77531          |       |                |         |                    | 1088.58534 |       |                |         |                     |            |
| R-Square (COD)          |                | 0.97181            |       |                |         |                    | 0.95924    |       |                |         |                     |            |
| Adj. R-Square           |                | 0.97112            |       |                |         |                    | 0.95823    |       |                |         |                     |            |

**Statistics for comparison of Branch volume (related to Fig. 7f)**

| Fit Comparison of Data                                                        |                                                            |          |                                                           |                       |
|-------------------------------------------------------------------------------|------------------------------------------------------------|----------|-----------------------------------------------------------|-----------------------|
| Description                                                                   |                                                            |          |                                                           |                       |
| Input Data                                                                    | CTRL<br>Source Data<br>TAB: Fig. 7d-g<br>Column: branchVol |          | INH<br>Source Data<br>TAB: Fig. 7d-g<br>Column: branchVol |                       |
| Fit Report                                                                    | Fit Report CTRL (see bellow)                               |          | Fit Report INH (see bellow)                               |                       |
| Equation                                                                      | $y = y_0 + A * e^{-\frac{1}{2} * (\frac{x-x_c}{w})^2}$     |          | $y = y_0 + A * e^{-\frac{1}{2} * (\frac{x-x_c}{w})^2}$    |                       |
| Function                                                                      | GaussAmp                                                   |          | GaussAmp                                                  |                       |
| Number of Points                                                              | 150                                                        |          | 150                                                       |                       |
| Number of Parameters                                                          | 7                                                          |          | 7                                                         |                       |
| F-test                                                                        |                                                            |          |                                                           |                       |
|                                                                               | F                                                          | Numer.DF | Denom.DF                                                  | Prob > F              |
|                                                                               | 9.239                                                      | 7        | 201                                                       | 6.695e <sup>-10</sup> |
| At the 0.05 significance level, the two datasets are significantly different. |                                                            |          |                                                           |                       |

| Fit Reports    |                         |           |        |                |                    |         |            |       |                |                   |         |            |
|----------------|-------------------------|-----------|--------|----------------|--------------------|---------|------------|-------|----------------|-------------------|---------|------------|
| Fit Parameters | Peak                    | Parameter | CTRL   |                |                    |         |            | INH   |                |                   |         |            |
|                |                         |           | Value  | Standard Error | t-Value            | Prob> t | Dependency | Value | Standard Error | t-Value           | Prob> t | Dependency |
|                |                         |           | Peak 1 | y <sub>0</sub> | 0.521              | 0.203   | 2.563      | 0.011 | 0.144          | 0.179             | 0.515   | 0.347      |
|                | x <sub>c</sub>          | 651.2     | 11.95  | 54.46          | 1e <sup>-97</sup>  | 0.836   | 758.0      | 20.16 | 37.59          | 2e <sup>-42</sup> | 0.913   |            |
|                | w                       | 221.5     | 22.79  | 9.718          | 1e <sup>-17</sup>  | 0.969   | 316.9      | 24.30 | 13.03          | 6e <sup>-19</sup> | 0.959   |            |
|                | A                       | 75.31     | 20.18  | 3.731          | 2.7e <sup>-4</sup> | 0.996   | 98.67      | 20.83 | 4.735          | 1e <sup>-5</sup>  | 0.996   |            |
|                | FWHM                    | 521.6     | 53.67  | -              | -                  | -       | 746.3      | 57.24 | -              | -                 | -       |            |
|                | Area                    | 41818     | 15362  | -              | -                  | -       | 78387      | 22267 | -              | -                 | -       |            |
| Peak 2         | y <sub>0</sub>          | 0.521     | 0.203  | 2.563          | 0.011              | 0.144   | 0.179      | 0.515 | 0.347          | 0.729             | 0.447   |            |
|                | x <sub>c</sub>          | 1058      | 142.4  | 7.431          | 8e <sup>-12</sup>  | 0.994   | 1403.5     | 957.8 | 1.465          | 0.148             | 0.994   |            |
|                | w                       | 372.0     | 59.69  | 6.232          | 4.8e <sup>-9</sup> | 0.980   | 520.3      | 464.9 | 1.119          | 0.267             | 0.983   |            |
|                | A                       | 45.90     | 10.08  | 4.550          | 1.1e <sup>-5</sup> | 0.992   | 10.22      | 9.086 | 1.125          | 0.265             | 0.987   |            |
|                | FWHM                    | 876.1     | 140.5  | -              | -                  | -       | 1225       | 1094  | -              | -                 | -       |            |
|                | Area                    | 42814     | 15919  | -              | -                  | -       | 13333      | 23254 | -              | -                 | -       |            |
| Fit Statistics | Number of Points        | 150       |        |                |                    |         | 65         |       |                |                   |         |            |
|                | Degrees of Freedom      | 143       |        |                |                    |         | 58         |       |                |                   |         |            |
|                | Reduced Chi-Sqr         | 5.31038   |        |                |                    |         | 9.53496    |       |                |                   |         |            |
|                | Residual Sum of Squares | 759.38391 |        |                |                    |         | 553.02786  |       |                |                   |         |            |
|                | R-Square (COD)          | 0.98577   |        |                |                    |         | 0.98921    |       |                |                   |         |            |
|                | Adj. R-Square           | 0.98518   |        |                |                    |         | 0.98809    |       |                |                   |         |            |

**Statistics for comparison of Number of Nodes per major branch (related to Fig. 7fg)**

| Fit Comparison of Data                                                        |                                                                       |          |                                                                      |                      |
|-------------------------------------------------------------------------------|-----------------------------------------------------------------------|----------|----------------------------------------------------------------------|----------------------|
| Description                                                                   |                                                                       |          |                                                                      |                      |
| Input Data                                                                    | CTRL<br>Source Data<br>TAB: Fig. 7d-g<br>Column: branchNodesPerBranch |          | INH<br>Source Data<br>TAB: Fig. 7d-g<br>Column: branchNodesPerBranch |                      |
| Fit Report                                                                    | Fit Report CTRL (see below)                                           |          | Fit Report INH (see below)                                           |                      |
| Equation                                                                      | $y = y_0 + A * e^{-\frac{1}{2} * (\frac{x-x_c}{w})^2}$                |          | $y = y_0 + A * e^{-\frac{1}{2} * (\frac{x-x_c}{w})^2}$               |                      |
| Function                                                                      | GaussAmp                                                              |          | GaussAmp                                                             |                      |
| Number of Points                                                              | 60                                                                    |          | 50                                                                   |                      |
| Number of Parameters                                                          | 7                                                                     |          | 7                                                                    |                      |
| F-test                                                                        |                                                                       |          |                                                                      |                      |
|                                                                               | F                                                                     | Numer.DF | Denom.DF                                                             | Prob > F             |
|                                                                               | 4.120                                                                 | 7        | 96                                                                   | 5.343e <sup>-4</sup> |
| At the 0.05 significance level, the two datasets are significantly different. |                                                                       |          |                                                                      |                      |

| Fit Reports    |                         |           |        |                |                    |         |            |       |                |                   |         |            |
|----------------|-------------------------|-----------|--------|----------------|--------------------|---------|------------|-------|----------------|-------------------|---------|------------|
| Fit Parameters | Peak                    | Parameter | CTRL   |                |                    |         |            | INH   |                |                   |         |            |
|                |                         |           | Value  | Standard Error | t-Value            | Prob> t | Dependency | Value | Standard Error | t-Value           | Prob> t | Dependency |
|                |                         |           | Peak 1 | y <sub>0</sub> | 1.314              | 0.802   | 1.638      | 0.107 | 0.294          | 2.432             | 1.022   | 2.380      |
|                | x <sub>c</sub>          | 7.810     | 0.162  | 47.95          | 2e <sup>-45</sup>  | 0.306   | 7.555      | 0.111 | 67.48          | 2e <sup>-45</sup> | 0.139   |            |
|                | w                       | 2.822     | 0.314  | 8.988          | 3e <sup>-12</sup>  | 0.875   | 2.059      | 0.172 | 11.93          | 3e <sup>-15</sup> | 0.758   |            |
|                | A                       | 97.151    | 13.76  | 7.055          | 3.6e <sup>-9</sup> | 0.942   | 122.1      | 8.966 | 13.61          | 3e <sup>-17</sup> | 0.764   |            |
|                | FWHM                    | 6.646     | 0.739  | -              | -                  | -       | 4.850      | 0.406 | -              | -                 | -       |            |
|                | Area                    | 687.3     | 163.8  | -              | -                  | -       | 630.1      | 83.72 | -              | -                 | -       |            |
| Peak 2         | y <sub>0</sub>          | 1.314     | 0.802  | 1.638          | 0.107              | 0.294   | 2.432      | 1.022 | 2.380          | 0.021             | 0.338   |            |
|                | x <sub>c</sub>          | 16.39     | 1.476  | 11.10          | 1e <sup>-15</sup>  | 0.945   | 15.18      | 0.950 | 15.96          | 1e <sup>-19</sup> | 0.817   |            |
|                | w                       | 6.790     | 1.016  | 6.681          | 1.4e <sup>-8</sup> | 0.921   | 6.862      | 0.716 | 9.573          | 3e <sup>-12</sup> | 0.778   |            |
|                | A                       | 59.35     | 4.140  | 14.33          | 7e <sup>-20</sup>  | 0.735   | 57.18      | 3.637 | 15.72          | 1e <sup>-19</sup> | 0.569   |            |
|                | FWHM                    | 15.98     | 2.392  | -              | -                  | -       | 16.15      | 1.687 | -              | -                 | -       |            |
|                | Area                    | 1010      | 194.1  | -              | -                  | -       | 983.5      | 123.2 | -              | -                 | -       |            |
| Fit Statistics | Number of Points        | 60        |        |                |                    |         | 50         |       |                |                   |         |            |
|                | Degrees of Freedom      | 53        |        |                |                    |         | 43         |       |                |                   |         |            |
|                | Reduced Chi-Sqr         | 27.25     |        |                |                    |         | 34.58      |       |                |                   |         |            |
|                | Residual Sum of Squares | 1444      |        |                |                    |         | 1486       |       |                |                   |         |            |
|                | R-Square (COD)          | 0.972     |        |                |                    |         | 0.973      |       |                |                   |         |            |
|                | Adj. R-Square           | 0.969     |        |                |                    |         | 0.969      |       |                |                   |         |            |

**Statistics for comparison of Branch length (related to Suppl. Fig. 14d)**

| Fit Comparison of Data                                                            |                                                                     |          |                                                                    |          |
|-----------------------------------------------------------------------------------|---------------------------------------------------------------------|----------|--------------------------------------------------------------------|----------|
| Description                                                                       |                                                                     |          |                                                                    |          |
| Input Data                                                                        | CTRL<br>Source Data<br>TAB: Fig. 7d-g<br>Column: branchLengthSkel 3 |          | INH<br>Source Data<br>TAB: Fig. 7d-g<br>Column: branchLengthSkel 3 |          |
| Fit Report                                                                        | Fit Report CTRL (see bellow)                                        |          | Fit Report INH (see bellow)                                        |          |
| Equation                                                                          | $y = y_0 + A * e^{-\frac{1}{2} * (\frac{x-x_c}{w})^2}$              |          | $y = y_0 + A * e^{-\frac{1}{2} * (\frac{x-x_c}{w})^2}$             |          |
| Function                                                                          | GaussAmp                                                            |          | GaussAmp                                                           |          |
| Number of Points                                                                  | 63                                                                  |          | 63                                                                 |          |
| Number of Parameters                                                              | 7                                                                   |          | 7                                                                  |          |
| F-test                                                                            |                                                                     |          |                                                                    |          |
|                                                                                   | F                                                                   | Numer.DF | Denom.DF                                                           | Prob > F |
|                                                                                   | 0.912                                                               | 7        | 112                                                                | 0.499    |
| At the 0.05 significance level, the two datasets are not significantly different. |                                                                     |          |                                                                    |          |

| Fit Reports    |                         |           |        |                |                   |         |            |       |                |                   |         |            |
|----------------|-------------------------|-----------|--------|----------------|-------------------|---------|------------|-------|----------------|-------------------|---------|------------|
| Fit Parameters | Peak                    | Parameter | CTRL   |                |                   |         |            | INH   |                |                   |         |            |
|                |                         |           | Value  | Standard Error | t-Value           | Prob> t | Dependency | Value | Standard Error | t-Value           | Prob> t | Dependency |
|                |                         |           | Peak 1 | y <sub>0</sub> | 0.759             | 0.955   | 0.795      | 0.429 | 0.562          | 1.932             | 0.855   | 2.258      |
|                | x <sub>c</sub>          | 6.653     | 0.134  | 49.62          | 5e <sup>-48</sup> | 0.257   | 6.366      | 0.106 | 59.73          | 2e <sup>-52</sup> | 0.157   |            |
|                | w                       | 2.174     | 0.258  | 8.423          | 1e <sup>-11</sup> | 0.866   | 1.685      | 0.170 | 9.859          | 7e <sup>-14</sup> | 0.781   |            |
|                | A                       | 60.79     | 8.779  | 6.924          | 4e <sup>-9</sup>  | 0.932   | 59.19      | 5.645 | 10.48          | 8e <sup>-15</sup> | 0.814   |            |
|                | FWHM                    | 5.119     | 0.607  | -              | -                 | -       | 3.969      | 0.402 | -              | -                 | -       |            |
|                | Area                    | 331.2     | 81.53  | -              | -                 | -       | 250.1      | 42.78 | -              | -                 | -       |            |
| Peak 2         | y <sub>0</sub>          | 0.759     | 0.955  | 0.795          | 0.429             | 0.562   | 1.932      | 0.855 | 2.258          | 0.027             | 0.522   |            |
|                | x <sub>c</sub>          | 13.29     | 1.615  | 8.232          | 3e <sup>-11</sup> | 0.937   | 12.24      | 0.859 | 14.24          | 2e <sup>-20</sup> | 0.850   |            |
|                | w                       | 5.411     | 1.150  | 4.701          | 1e <sup>-5</sup>  | 0.916   | 5.156      | 0.656 | 7.849          | 1e <sup>-10</sup> | 0.825   |            |
|                | A                       | 27.40     | 2.919  | 9.3886         | 4e <sup>-13</sup> | 0.753   | 30.50      | 2.290 | 13.32          | 5e <sup>-19</sup> | 0.632   |            |
|                | FWHM                    | 12.74     | 2.710  | -              | -                 | -       | 12.14      | 1.546 | -              | -                 | -       |            |
|                | Area                    | 371.7     | 104.1  | -              | -                 | -       | 394.3      | 63.31 | -              | -                 | -       |            |
| Fit Statistics | Number of Points        | 63        |        |                |                   |         | 63         |       |                |                   |         |            |
|                | Degrees of Freedom      | 56        |        |                |                   |         | 56         |       |                |                   |         |            |
|                | Reduced Chi-Sqr         | 25.14     |        |                |                   |         | 22.02      |       |                |                   |         |            |
|                | Residual Sum of Squares | 1407      |        |                |                   |         | 1233       |       |                |                   |         |            |
|                | R-Square (COD)          | 0.947     |        |                |                   |         | 0.950      |       |                |                   |         |            |
|                | Adj. R-Square           | 0.942     |        |                |                   |         | 0.945      |       |                |                   |         |            |

**Statistics for comparison of Number of Major Branches (related to Suppl. Fig. 14e)**

| Fit Comparison of Data                                                            |                                                                       |          |                                                                      |          |
|-----------------------------------------------------------------------------------|-----------------------------------------------------------------------|----------|----------------------------------------------------------------------|----------|
| Description                                                                       |                                                                       |          |                                                                      |          |
| Input Data                                                                        | CTRL<br>Source Data<br>TAB: Fig. 7d-g<br>Column: branchNodesPerBranch |          | INH<br>Source Data<br>TAB: Fig. 7d-g<br>Column: branchNodesPerBranch |          |
| Fit Report                                                                        | Fit Report CTRL (see bellow)                                          |          | Fit Report INH (see bellow)                                          |          |
| Equation                                                                          | $y = y_0 + A * e^{-\frac{1}{2} * (\frac{x-x_0}{w})^2}$                |          | $y = y_0 + A * e^{-\frac{1}{2} * (\frac{x-x_0}{w})^2}$               |          |
| Function                                                                          | GaussAmp                                                              |          | GaussAmp                                                             |          |
| Number of Points                                                                  | 21                                                                    |          | 21                                                                   |          |
| Number of Parameters                                                              | 7                                                                     |          | 7                                                                    |          |
| F-test                                                                            |                                                                       |          |                                                                      |          |
|                                                                                   | F                                                                     | Numer.DF | Denom.DF                                                             | Prob > F |
|                                                                                   | 0.2034                                                                | 7        | 28                                                                   | 0.98199  |
| At the 0.05 significance level, the two datasets are not significantly different. |                                                                       |          |                                                                      |          |

| Fit Reports    |                         |           |       |                |         |         |            |       |                |         |         |            |       |
|----------------|-------------------------|-----------|-------|----------------|---------|---------|------------|-------|----------------|---------|---------|------------|-------|
| Fit Parameters | Peak                    | Parameter | CTRL  |                |         |         |            | INH   |                |         |         |            |       |
|                |                         |           | Value | Standard Error | t-Value | Prob> t | Dependency | Value | Standard Error | t-Value | Prob> t | Dependency |       |
|                | Peak 1                  |           | y0    | 0.936          | 2.203   | 0.424   | 0.677      | 0.570 | 1.401          | 1.866   | 0.750   | 0.465      | 0.546 |
|                |                         | xc        | 7.757 | 0.661          | 11.72   | 1.26E-8 | 0.975      | 7.349 | 0.421          | 17.44   | 6.7E-11 | 0.944      |       |
|                |                         | w         | 2.672 | 0.773          | 3.455   | 0.003   | 0.987      | 2.459 | 0.620          | 3.965   | 0.001   | 0.983      |       |
|                |                         | A         | 156.3 | 180.8          | 0.864   | 0.401   | 0.999      | 137.2 | 117.6          | 1.165   | 0.263   | 0.998      |       |
|                |                         | FWHM      | 6.293 | 1.821          | -       | -       | -          | 5.791 | 1.460          | -       | -       | -          |       |
|                |                         | Area      | 1047  | 1508           | -       | -       | -          | 845.8 | 933.8          | -       | -       | -          |       |
| Peak 2         |                         |           | y0    | 0.936          | 2.203   | 0.424   | 0.677      | 0.570 | 1.401          | 1.866   | 0.750   | 0.465      | 0.546 |
|                |                         |           | xc    | 11.95          | 7.249   | 1.648   | 0.121      | 0.998 | 11.41          | 3.675   | 3.104   | 0.007      | 0.997 |
|                |                         |           | w     | 3.908          | 2.668   | 1.464   | 0.165      | 0.994 | 3.777          | 1.421   | 2.656   | 0.018      | 0.990 |
|                |                         |           | A     | 80.35          | 103.9   | 0.772   | 0.452      | 0.998 | 101.5          | 64.76   | 1.567   | 0.139      | 0.997 |
|                |                         | FWHM      | 9.204 | 6.283          | -       | -       | -          | 8.896 | 3.348          | -       | -       | -          |       |
|                |                         | Area      | 787.3 | 1544.3         | -       | -       | -          | 961.2 | 963.7          | -       | -       | -          |       |
| Fit Statistics | Number of Points        | 21        |       |                |         |         | 21         |       |                |         |         |            |       |
|                | Degrees of Freedom      | 14        |       |                |         |         | 14         |       |                |         |         |            |       |
|                | Reduced Chi-Sqr         | 43.74     |       |                |         |         | 33.21      |       |                |         |         |            |       |
|                | Residual Sum of Squares | 612.3     |       |                |         |         | 464.9      |       |                |         |         |            |       |
|                | R-Square (COD)          | 0.993     |       |                |         |         | 0.994      |       |                |         |         |            |       |
|                | Adj. R-Square           | 0.990     |       |                |         |         | 0.992      |       |                |         |         |            |       |
